# Supplementary material for: Unexpectedly high concentrations of atmospheric mercury species in Lhasa, the largest city in the Tibetan Plateau
Source: Copernicus journal article supplement (doi:10.5194/acp-23-3937-2023), 2023-04-04
Supplement: Supplementary file 1 [file acp-23-3937-2023-supplement.pdf]

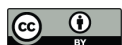

*Supplement of*

## **Unexpectedly high concentrations of atmospheric mercury species in Lhasa, the largest city in the Tibetan Plateau**

**Huiming Lin et al.**

*Correspondence to:* Xuejun Wang (wangxuejun@pku.edu.cn) and Yindong Tong (yindongtong@tju.edu.cn)

The copyright of individual parts of the supplement might differ from the article licence.

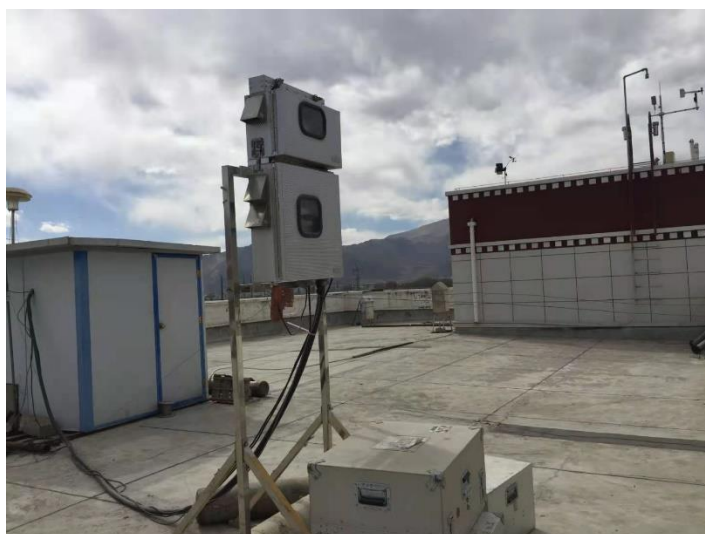

**Figure S1 Monitoring of mercury species in Lhasa**

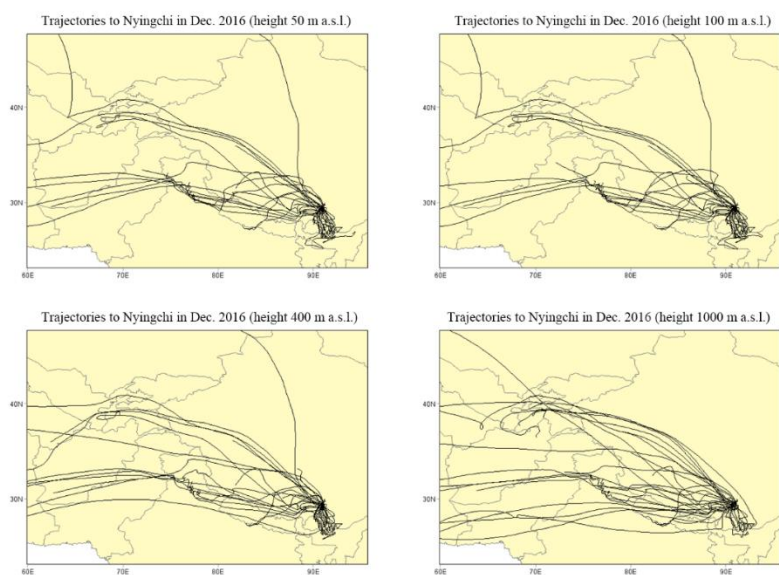

**Figure S2 Trajectories to Lhasa in December 2016 with different arrival heights**

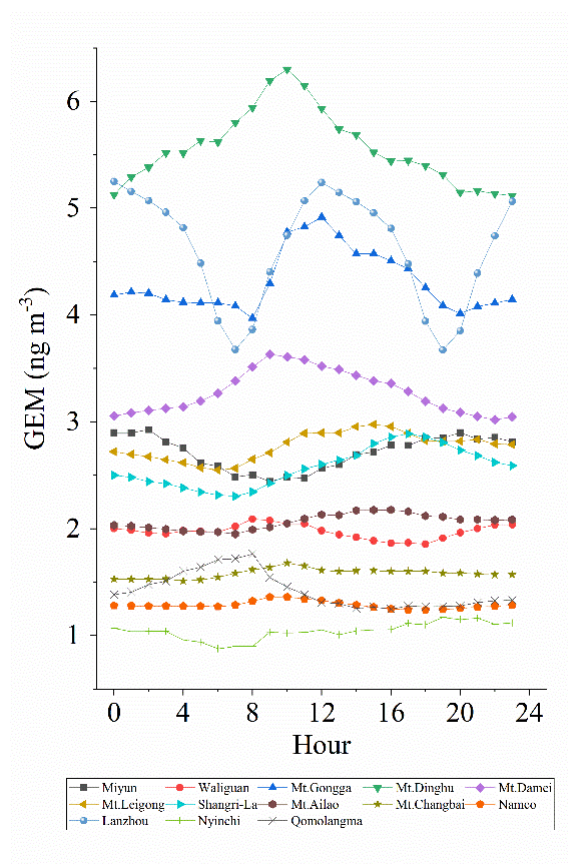

**Figure S3 Diurnal variation patterns obtained from station monitoring in other remote areas of China**

**Table S1 GEM concentration and the proportion of the trajectories in the cluster analysis**

| Period | Cluster_Num | GEM(ng<br>m <sup>-3</sup> ) | Ratio  |
|--------|-------------|-----------------------------|--------|
| S-ISM  | 1           | 2.66                        | 87.35% |
|        | 2           | 2.13                        | 6.02%  |
|        | 3           | 2.8                         | 6.63%  |
| WEC1   | 1           | 2.41                        | 63.89% |
|        | 2           | 2.33                        | 16.16% |
|        | 3           | 2.35                        | 19.95% |
| WEC2   | 1           | 1.43                        | 28.98% |
|        | 2           | 0.93                        | 1.14%  |
|        | 3           | 1.47                        | 59.66% |
|        | 4           | 1.58                        | 10.23% |
